# Supplementary material for: Outcomes of comprehensive fixed appliance orthodontic treatment: A systematic review with meta-analysis and methodological overview
Source: PubMed Central journal article supplement — Korean J Orthod. 2017 Sep 29;47(6):401–13. doi: 10.4041/kjod.2017.47.6.401 (PMC5653689; doi:10.4041/kjod.2017.47.6.401), 2017-09-29
Supplement: kjod-47-401-s001.pdf [file kjod-47-401-s001.pdf]

## Appendix

### Outcome of comprehensive fixed appliance orthodontic treatment: a systematic review with meta-analysis and methodological overview

**Appendix A.** A priori eligibility criteria used in the review.

| Domain              | Inclusion                                                                                                                                                                                                          | Exclusion                                                                                                                                                                                     |
|---------------------|--------------------------------------------------------------------------------------------------------------------------------------------------------------------------------------------------------------------|-----------------------------------------------------------------------------------------------------------------------------------------------------------------------------------------------|
| Participants        | Human patients of any age*/sex*/ethnicity*/malocclusion* that are planned to receive comprehensive orthodontic treatment                                                                                           | Animal studies                                                                                                                                                                                |
| Interventions       | Comprehensive orthodontic treatment with fixed appliances on all teeth (with the possible exception of second molars) in a one-phase or a two-phase treatment with any co-interventions                            | Any orthodontic treatment that did not include a comprehensive phase with fixed appliances at all                                                                                             |
|                     | -                                                                                                                                                                                                                  | Comprehensive orthodontic treatment with novel appliances that have not yet been assessed by robust clinical evidence (aligners, lingual appliances, CAD/CAM- or surgery-assisted appliances) |
| Comparisons         | No separate comparison group (single-group cohort studies)                                                                                                                                                         | -                                                                                                                                                                                             |
|                     | Similar patients that receive comprehensive treatment differing from the "Intervention" group only in the administered intervention or co-intervention (including patient, appliance or treatment characteristics) | -                                                                                                                                                                                             |
| Outcome – primary   | Occlusal outcome after fixed appliance orthodontic treatment, assessed with the ABO OGS tool                                                                                                                       | -                                                                                                                                                                                             |
| Outcome – secondary | Treatment duration in months                                                                                                                                                                                       | -                                                                                                                                                                                             |
| Study design        | Randomized controlled trials (parallel)                                                                                                                                                                            | Cross-sectional studies that assess previous extractions                                                                                                                                      |
|                     | Non-randomized prospective or retrospective clinical cohort studies with a single patient group                                                                                                                    | Case reports/ case series                                                                                                                                                                     |
|                     | Non-randomized prospective or retrospective clinical cohort studies with at two or more experimental groups                                                                                                        | Non-clinical studies (in vitro, ex vivo, in silico, etc)                                                                                                                                      |
|                     |                                                                                                                                                                                                                    | Systematic reviews (after checked for additional studies)                                                                                                                                     |

\*this factor's role is planned to be assessed through subgroup/meta-regression analyses
