# Supplementary material for: Outcomes of comprehensive fixed appliance orthodontic treatment: A systematic review with meta-analysis and methodological overview
Source: PubMed Central journal article supplement — Korean J Orthod. 2017 Sep 29;47(6):401–13. doi: 10.4041/kjod.2017.47.6.401 (PMC5653689; doi:10.4041/kjod.2017.47.6.401), 2017-09-29
Supplement: kjod-47-401-s002.pdf [file kjod-47-401-s002.pdf]

**Appendix B.** Literature databases searched (last search October, 2016).

| Database                     | Site                                                                                                                        | Search strategy                                                                                                                                                                                                                                                                                                                                                            | Limit                                                                                                                                                                                                                                                                                              | Hits |
|------------------------------|-----------------------------------------------------------------------------------------------------------------------------|----------------------------------------------------------------------------------------------------------------------------------------------------------------------------------------------------------------------------------------------------------------------------------------------------------------------------------------------------------------------------|----------------------------------------------------------------------------------------------------------------------------------------------------------------------------------------------------------------------------------------------------------------------------------------------------|------|
| PubMed                       | <a href="http://www.ncbi.nlm.nih.gov/pubmed/">http://www.ncbi.nlm.nih.gov/pubmed/</a>                                       | orthodon* AND ("American Board" OR ABO OR "ABO-OGS" OR "objective grading")                                                                                                                                                                                                                                                                                                | <b>Article types:</b> Clinical Study; Clinical Trial; Comparative Study; Controlled Clinical Trial; Evaluation Studies; Journal article; Meta-analyses; Multicenter Study; Observational Study; Pragmatic Clinical Trial; Randomized Controlled Trial; Systematic Reviews<br><b>Species:</b> Human | 185  |
| Cochrane Library (CDSR/DARE) | <a href="http://onlinelibrary.wiley.com/cochranelibrary/search/">http://onlinelibrary.wiley.com/cochranelibrary/search/</a> | Same with PubMed                                                                                                                                                                                                                                                                                                                                                           | -                                                                                                                                                                                                                                                                                                  | 0    |
| Cochrane Library (CENTRAL)   | <a href="http://onlinelibrary.wiley.com/cochranelibrary/search/">http://onlinelibrary.wiley.com/cochranelibrary/search/</a> | Same with PubMed                                                                                                                                                                                                                                                                                                                                                           | -                                                                                                                                                                                                                                                                                                  | 4    |
| Embase                       | <a href="http://www.embase.com/#advancedSearch/default">http://www.embase.com/#advancedSearch/default</a>                   | Same with PubMed                                                                                                                                                                                                                                                                                                                                                           | -                                                                                                                                                                                                                                                                                                  | 14   |
| Virtual Health Library       | <a href="http://pesquisa.bvsalud.org/portal/advanced/?lang=en">http://pesquisa.bvsalud.org/portal/advanced/?lang=en</a>     | Same with PubMed                                                                                                                                                                                                                                                                                                                                                           | -                                                                                                                                                                                                                                                                                                  | 7    |
| Scopus                       | <a href="http://www.scopus.com/">http://www.scopus.com/</a>                                                                 | TITLE-ABS-KEY ( orthodon* AND ( "American Board" OR abo OR "ABO-OGS" OR "objective grading" ) ) AND ( LIMIT-TO ( SUBJAREA , "DENT" ) ) AND ( LIMIT-TO ( EXACTKEYWORD , "Human" ) OR LIMIT-TO ( EXACTKEYWORD , "Humans" ) ) AND ( EXCLUDE ( DOCTYPE , "re" ) OR EXCLUDE ( DOCTYPE , "ed" ) OR EXCLUDE ( DOCTYPE , "le" ) ) AND ( EXCLUDE ( EXACTKEYWORD , "Case Report" ) ) | <b>Research area:</b> Dentistry                                                                                                                                                                                                                                                                    | 89   |
| ISI Web of Knowledge         | <a href="http://apps.webofknowledge.com">http://apps.webofknowledge.com</a>                                                 | Same with PubMed                                                                                                                                                                                                                                                                                                                                                           | <b>Research area:</b> Dentistry oral surgery medicine<br><b>Document type:</b> article                                                                                                                                                                                                             | 181  |
| ClinicalTrials.gov           | <a href="https://clinicaltrials.gov/">https://clinicaltrials.gov/</a>                                                       | Same with PubMed                                                                                                                                                                                                                                                                                                                                                           | -                                                                                                                                                                                                                                                                                                  | 0    |
