# Supplementary material for: Outcomes of comprehensive fixed appliance orthodontic treatment: A systematic review with meta-analysis and methodological overview
Source: PubMed Central journal article supplement — Korean J Orthod. 2017 Sep 29;47(6):401–13. doi: 10.4041/kjod.2017.47.6.401 (PMC5653689; doi:10.4041/kjod.2017.47.6.401), 2017-09-29
Supplement: kjod-47-401-s003.pdf [file kjod-47-401-s003.pdf]

**Appendix C.** List of studies included/excluded from this systematic review with reasons.

| AA                        | Paper                                                                                                                                                                                                                                                                                       |                   |
|---------------------------|---------------------------------------------------------------------------------------------------------------------------------------------------------------------------------------------------------------------------------------------------------------------------------------------|-------------------|
| Excluded during screening |                                                                                                                                                                                                                                                                                             |                   |
| 1                         | [No authors] A Comparative-Study of the Ages of American Board of Orthodontics Diplomates. Am J Orthod Dentofac Orthop 1991;100(5):482-3.                                                                                                                                                   | Excluded by title |
| 2                         | [No authors] ABO presents typical case report examples for future candidates. American journal of orthodontics. 1978;73(1):79-84. Epub 1978/01/01.                                                                                                                                          | Excluded by title |
| 3                         | [No authors] American Board of Orthodontics - Past, present, and future. Am J Orthod Dentofac Orthop 1996;110(1):108-10.                                                                                                                                                                    | Excluded by title |
| 4                         | [No authors] American Board of Orthodontics sets new standards and requirements. American journal of orthodontics. 1973;64(2):199-200. Epub 1973/08/01.                                                                                                                                     | Excluded by title |
| 5                         | [No authors] American Board of Orthodontics. Why case reports do not pass the ABO Phase III clinical examination. Am J Orthod Dentofac Orthop 1996;110(5):559-60. Epub 1996/11/01.                                                                                                          | Excluded by title |
| 6                         | [No authors] Foundations of excellence: the ABO in review--1984-1994. Am J Orthod Dentofac Orthop 1995;107(1):103-5.                                                                                                                                                                        | Excluded by title |
| 7                         | [No authors] Presentation of the Ketcham,Albert,H Memorial Award, 1954 by Webster,Raymond,L President of the American Board of Orthodontics. Am J Orthod Dentofac Orthop 1954;40(10):783-9.                                                                                                 | Excluded by title |
| 8                         | [No authors] Presentation of the Ketcham,Albert,H. Memorial Award, 1953, by Waugh,Leuman,M. President of the American-Board-of-Orthodontics. Am J Orthod Dentofac Orthop 1953;39(7):545-51.                                                                                                 | Excluded by title |
| 9                         | Ackerman MB, Rinchuse DJ. ABO certification in the age of evidence and enhancement. Am J Orthod Dentofac Orthop 2006;130(2):133-40. Epub 2006/08/15.                                                                                                                                        | Excluded by title |
| 10                        | Ahmad Shokor FFB, Ab Rahman WSW, Khursheed Alam M. Craniofacial morphology with genetic influence of abo blood group in malaysian orthodontic patients. International Journal of Pharma and Bio Sciences. 2015;6(4):B412-B8.                                                                | Excluded by title |
| 11                        | Akylalcin S, Frels LK, English JD, Laman S. Analysis of smile esthetics in American Board of Orthodontic patients. The Angle orthodontist. 2014;84(3):486-91. Epub 2013/10/29.                                                                                                              | Excluded by title |
| 12                        | Anon. An interview with Marissa C. Keesler. Dental Press J Orthod. 2014;19(2):27-38.                                                                                                                                                                                                        | Excluded by title |
| 13                        | Ashwinirani SR, Suragimath G, Sande AR, Kulkarni P, Nimbale A, Shankar T, et al. Comparison of lip print patterns in two indian subpopulations and its correlation in abo blood groups. Journal of Clinical and Diagnostic Research. 2014;8(10):ZC40-ZC3.                                   | Excluded by title |
| 14                        | Baker RW, Jr., Subtelny JD, Iranpour B. An American Board of Orthodontics case report. Correction of a Class III mandibular prognathism and asymmetry through orthodontics and orthognathic surgery. Am J Orthod Dentofac Orthop 1991;99(3):191-201. Epub 1991/03/11.                       | Excluded by title |
| 15                        | Bilodeau JE. An American Board of Orthodontics case report. Am J Orthod Dentofac Orthop 1997;111(5):487-91.                                                                                                                                                                                 | Excluded by title |
| 16                        | Bishara SE, Nemeth R. Current challenges and future dilemmas facing the orthodontic profession. Proceedings of a Workshop, The College of Diplomates of the American Board of Orthodontics. Sun Valley, Idaho, July 21-25, 2001. The Angle orthodontist. 2002;72(1):88-90. Epub 2002/02/15. | Excluded by title |
| 17                        | Bond JA. Orthopedic/orthodontic treatment of a Class I malocclusion with a Class III skeletal pattern and maxillary deficiency. An American Board of Orthodontics case report. Am J Orthod Dentofac Orthop 1987;91(5):429-37. Epub 1987/05/01.                                              | Excluded by title |
| 18                        | Boskabadi H, Mafinezhad S, Bagher F, Bozorgnia Y. Incidence of thrombocytopenia in idiopathic hyperbilirubinemic newborns. Macedonian Journal of Medical Sciences. 2014;7(2):259-62.                                                                                                        | Excluded by title |
| 19                        | Briss BS, English JD, Riolo ML, Greco PM. A guide to writing ABO test items. Am J Orthod Dentofac Orthop 2005;128(3):397-401. Epub 2005/09/20.                                                                                                                                              | Excluded by title |
| 20                        | Bruner MK, Hilgers KK, Silveira AM, Butters JM. Graduate orthodontic education: the residents' perspective. Am J Orthod Dentofac Orthop 2005;128(3):277-82. Epub 2005/09/20.                                                                                                                | Excluded by title |
| 21                        | Carrillo R, Rossouw PE. Orthodontic treatment for a patient with congenital cutis laxa. Am J Orthod Dentofac Orthop 2009;136(2):282-9. Epub 2009/08/05.                                                                                                                                     | Excluded by title |
| 22                        | Castelein PT, DeLeon E, Jr., Dugoni SA, Chung CH, Tadlock LP, Barone ND, et al. Certification renewal process of the American Board of Orthodontics. Am J Orthod Dentofac Orthop 2015;147(5 Suppl):S232-3. Epub 2015/05/01.                                                                 | Excluded by title |
| 23                        | Chan MD. An adult malocclusion requiring a combination of orthodontic and prosthodontic treatment. Am J Orthod Dentofac Orthop 1997;111(1):100-5. Epub 1997/01/01.                                                                                                                          | Excluded by title |
| 24                        | Childers K. Case report Category 6: Class II Division 1 with severe crowding. Am J Orthod Dentofac Orthop 2004;126(2):245-53. Epub 2004/08/19.                                                                                                                                              | Excluded by title |
| 25                        | Cho HJ. Patient with severe skeletal Class III malocclusion and severe open bite treated by orthodontics and orthognathic surgery - A case report. Am J Orthod Dentofac Orthop 1996;110(2):155-62.                                                                                          | Excluded by title |
| 26                        | Chojnacki W, Chojnacka A. ABO and Rh blood groups in children with harelip and cleft palate. Czasopismo Stomatologiczne. 1973;26(6):627-9.                                                                                                                                                  | Excluded by title |
| 27                        | Collins MK. A nonsurgical approach to treatment of a high angle Class II, Division 1 malocclusion in a nongrowing patient. Am J Orthod Dentofac Orthop 1996;110(6):678-81. Epub 1996/12/01.                                                                                                 | Excluded by title |
| 28                        | Coreil MN. Treatment of a patient with a Class II malocclusion and an extremely high mandibular plane angle and severe crowding. Am J Orthod Dentofac Orthop 1997;111(1):93-9.                                                                                                              | Excluded by title |
| 29                        | Cowan RG, Jr. Treatment of a patient with a Class II malocclusion, impacted canine, and severe malalignment. Am J Orthod Dentofac Orthop 2000;118(6):693-8. Epub 2000/12/13.                                                                                                                | Excluded by title |
| 30                        | Cureton SL. A significant transverse discrepancy: a case with a high mandibular plane angle, a severe maxillary arch length deficiency, and significant transverse discrepancy. Am J Orthod Dentofac Orthop 1998;114(3):307-10. Epub 1998/09/22.                                            | Excluded by title |
| 31                        | Damone J. ABO working to improve board-certification process. Am J Orthod Dentofac Orthop 2002;121(2):16A-7A.                                                                                                                                                                               | Excluded by title |
| 32                        | de Cuebas JO. Nonsurgical treatment of a skeletal vertical discrepancy with a significant open bite. Am J Orthod Dentofac Orthop 1997;112(2):124-31. Epub 1997/08/01.                                                                                                                       | Excluded by title |
| 33                        | Decker JD, Chen C. Adaptive response of the human dental alveolar process: correction of a Class I protrusive and mutilated dentition, with 32-year follow-up. Am J Orthod Dentofac Orthop 2009;135(4 Suppl):S113-22. Epub 2009/04/23.                                                      | Excluded by title |
| 34                        | Decker JD. Asymmetric mandibular prognathism: a 30-year retrospective case report. Am J Orthod Dentofac Orthop 2006;129(3):436-43. Epub 2006/03/11.                                                                                                                                         | Excluded by title |
| 35                        | Devries BG. Some views of the American Board of Orthodontics on orthodontic education. American journal of orthodontics.                                                                                                                                                                    | Excluded by title |

|    |                                                                                                                                                                                                                                                                                                                                                     |                   |
|----|-----------------------------------------------------------------------------------------------------------------------------------------------------------------------------------------------------------------------------------------------------------------------------------------------------------------------------------------------------|-------------------|
|    | 1949;35(4):289-91. Epub 1949/04/01.                                                                                                                                                                                                                                                                                                                 |                   |
| 36 | Dewel BF. Editorial: The American Board of Orthodontics: a historic milestone. American journal of orthodontics. 1969;55(4):410-1. Epub 1969/04/01.                                                                                                                                                                                                 | Excluded by title |
| 37 | Dhane JM. An American Board of Orthodontics case report: treatment of a Class I malocclusion with a significant transverse discrepancy and high mandibular plane angle. Am J Orthod Dentofac Orthop 1997;111(3):247-52. Epub 1997/03/01.                                                                                                            | Excluded by title |
| 38 | Dugoni SA, Lee JS. American Board of Orthodontics Case-Report. Am J Orthod Dentofac Orthop 1991;100(2):99-105.                                                                                                                                                                                                                                      | Excluded by title |
| 39 | Dunbar JP, Goldin B, Subtelny JD. An American Board of Orthodontics case report. Correction of Class I crowding in an achondroplastic patient. Am J Orthod Dentofac Orthop 1989;96(3):255-63. Epub 1989/09/01.                                                                                                                                      | Excluded by title |
| 40 | Dykhouse VJ, Moffitt AH, Grubb JE, Greco PM, English JD, Briss BS, et al. ABO initial certification examination: official announcement of criteria. Am J Orthod Dentofac Orthop 2006;130(5):662-5. Epub 2006/11/18.                                                                                                                                 | Excluded by title |
| 41 | Efstratiadis SS. An American Board of Orthodontics case report. Treatment of an open bite malocclusion. Am J Orthod Dentofac Orthop 1990;98(2):94-102. Epub 1990/08/01.                                                                                                                                                                             | Excluded by title |
| 42 | Emrich SC. An American Board of Orthodontics case report: an adult nonsurgical patient whose treatment required combined dental disciplines. Am J Orthod Dentofac Orthop 1996;110(2):163-9. Epub 1996/08/01.                                                                                                                                        | Excluded by title |
| 43 | English JD, Briss BS, Diemer R. ABO invites question for phase II examination. Am J Orthod Dentofac Orthop 2004;126(3):388. Epub 2004/09/10.                                                                                                                                                                                                        | Excluded by title |
| 44 | English JD, Briss BS, Jamieson SA, Kastrop MC, Castelein PT, Deleon E, Jr., et al. Common errors in preparing for and completing the American Board of Orthodontics clinical examination. Am J Orthod Dentofac Orthop 2011;139(1):136-7.                                                                                                            | Excluded by title |
| 45 | Ernest Iii EA. Percutaneous thermal lesioning of the temporomandibular posterior-superior disc ligament to effect adequate articular disc stabilization. Journal of Neurological and Orthopaedic Medicine and Surgery. 1988;9(2):111-5.                                                                                                             | Excluded by title |
| 46 | Fenner M, Kessler P, Holst S, Nkenke E, Neukam FW, Holst AI. Blood transfusion in bimaxillary orthognathic operations: Need for testing of type and screen. British Journal of Oral and Maxillofacial Surgery. 2009;47(8):612-5.                                                                                                                    | Excluded by title |
| 47 | Fink FS. Preceptorship revisited. Am J Orthod Dentofac Orthop 2007;131(5):664-5. Epub 2007/05/08.                                                                                                                                                                                                                                                   | Excluded by title |
| 48 | Fox JN. An American Board of Orthodontics case report. A nonsurgical and nonextraction approach in the treatment of a skeletal and dental Class III malocclusion in a growing patient. Am J Orthod Dentofac Orthop 1990;98(5):470-5.                                                                                                                | Excluded by title |
| 49 | Frank CA. An American Board of Orthodontics case report: the orthodontic-surgical correction of a Class I malocclusion with high mandibular plane angle, bimaxillary protrusion, and vertical maxillary excess. Am J Orthod Dentofac Orthop 1993;104(3):285-97. Epub 1993/09/01.                                                                    | Excluded by title |
| 50 | Frank CA. An American Board of Orthodontics Case-Report - the Nonsurgical Orthodontic Correction of a Class-ii Malocclusion. Am J Orthod Dentofac Orthop 1993;103(2):107-14.                                                                                                                                                                        | Excluded by title |
| 51 | García-Hernández F, Beltrán Varas VJ. Agenesia del tercer molar en una etnia originaria del Norte de Chile: Aymaras. Int j morphol. 2009;27(1):151-8.                                                                                                                                                                                               | Excluded by title |
| 52 | Glenn G. An American Board of Orthodontics case report: the nonsurgical orthodontic correction of a Class III malocclusion. Am J Orthod Dentofac Orthop 1997;111(2):149-55. Epub 1997/02/01.                                                                                                                                                        | Excluded by title |
| 53 | Glenn G. An American Board of Orthodontics case report: the orthodontic-surgical correction of a Class II malocclusion with anterior open bite. Am J Orthod Dentofac Orthop 1996;110(1):81-7. Epub 1996/07/01.                                                                                                                                      | Excluded by title |
| 54 | Goonewardene RW, Goonewardene MS, Razza JM, Murray K. Accuracy and validity of space analysis and irregularity index measurements using digital models. Australian orthodontic journal. 2008;24(2):83-90.                                                                                                                                           | Excluded by title |
| 55 | Gorman JC. Make ABO exam more user-friendly. Am J Orthod Dentofac Orthop 2005;128(1):7.                                                                                                                                                                                                                                                             | Excluded by title |
| 56 | Greco PM, English JD, Briss BS, Jamieson SA, Kastrop MC, Castelein PT, et al. Banking cases for the American Board of Orthodontics' initial certification examination. Am J Orthod Dentofac Orthop 2010;137(5):575-6. Epub 2010/05/11.                                                                                                              | Excluded by title |
| 57 | Greene CS, Stockstill J, Rinchuse D, Kandasamy S. Orthodontics and temporomandibular disorders: a curriculum proposal for postgraduate programs. Am J Orthod Dentofac Orthop 2012;142(1):18-24. Epub 2012/07/04.                                                                                                                                    | Excluded by title |
| 58 | Griffies JM, Meyers CE. Treatment of a Class I bimaxillary protrusive malocclusion with a high mandibular plane angle: An American Board of Orthodontics case report. Am J Orthod Dentofac Orthop 2000;117(1):60-7. Epub 2000/01/12.                                                                                                                | Excluded by title |
| 59 | Grob DJ. Extraction of a mandibular incisor in a Class I malocclusion. Am J Orthod Dentofac Orthop 1995;108(5):533-41.                                                                                                                                                                                                                              | Excluded by title |
| 60 | Grubb JE, Greco PM, English JD, Briss BS, Jamieson SA, Kastrop MC, et al. Radiographic and periodontal requirements of the American Board of Orthodontics: a modification in the case display requirements for adult and periodically involved adolescent and preadolescent patients. Am J Orthod Dentofac Orthop 2008;134(1):3-4. Epub 2008/07/12. | Excluded by title |
| 61 | Gu Y, McNamara JA, Jr. Cephalometric superimpositions. The Angle orthodontist. 2008;78(6):967-76. Epub 2008/10/25.                                                                                                                                                                                                                                  | Excluded by title |
| 62 | Hart TC, Bowden DW, Bolyard J, Kula K, Hall K, Wright JT. Genetic linkage of the tricho-dento-osseous syndrome to chromosome 17q21. Human Molecular Genetics. 1997;6(13):2279-84.                                                                                                                                                                   | Excluded by title |
| 63 | Hinkle FG. An American Board of Orthodontics case report. Surgical treatment of adult Class II, division 2 malocclusion. Am J Orthod Dentofac Orthop 1989;95(3):185-91. Epub 1989/03/01.                                                                                                                                                            | Excluded by title |
| 64 | Hopkins SC. The Present Status of the American-Board-of-Orthodontics. Am J Orthod Dentofac Orthop 1952;38(7):552-5.                                                                                                                                                                                                                                 | Excluded by title |
| 65 | Jerrold L. Litigation and legislation. Failing the ABO examination: admissible evidence? Am J Orthod Dentofac Orthop 2011;140(6):900-1. Epub 2011/12/03.                                                                                                                                                                                            | Excluded by title |
| 66 | Justus Doczi R. Informe de un caso presentado ante el American Board of Orthodontics (segunda parte). Pract Odontol. 1991;12(10):21-5.                                                                                                                                                                                                              | Excluded by title |
| 67 | Kassisieh SA, Collins MK, English JD. Orthosurgical correction of a Class II open bite, with previous first premolar extractions without follow-up orthodontic treatment. Am J Orthod Dentofac Orthop 1997;112(6):589-95.                                                                                                                           | Excluded by title |
| 68 | Keim RG, Sinclair PM. Orthodontic graduate education survey, 1983-2000. Am J Orthod Dentofac Orthop 2002;121(1):2-8.                                                                                                                                                                                                                                | Excluded by title |
| 69 | Kelly MF. Light-wire treatment of a Class II, division 1 subdivision malocclusion. An American Board of Orthodontics case report. American journal of orthodontics. 1986;89(3):216-22. Epub 1986/03/01.                                                                                                                                             | Excluded by title |
| 70 | Keränen P, Koort J, Itäälä A, Ylänen H, Dalstra M, Hupa M, et al. Bioceramic inlays do not improve mechanical incorporation of grit-blasted titanium stems in the proximal sheep femur. J Biomed Mat Res - Part A. 2010;92(4):1578-86.                                                                                                              | Excluded by title |
| 71 | Kim KR. Category 2: Adult malocclusion with open bite. Am J Orthod Dentofac Orthop 2009;135(1):127-32. Epub 2009/01/06.                                                                                                                                                                                                                             | Excluded by title |
| 72 | King L. Category 1: Interceptive or early treatment. Am J Orthod Dentofac Orthop 2004;126(4):506-16. Epub 2004/10/08.                                                                                                                                                                                                                               | Excluded by title |
| 73 | Klontz KJ. Category 5: Class II Division 1 malocclusion. Am J Orthod Dentofac Orthop 2005;127(2):242-8. Epub 2005/03/08.                                                                                                                                                                                                                            | Excluded by title |
| 74 | Kohda N, Iijima M, Muguruma T, Brantley WA, Ahluwalia KS, Mizoguchi I. Effects of mechanical properties of thermoplastic                                                                                                                                                                                                                            | Excluded by title |

|     |                                                                                                                                                                                                                                                                                                         |                   |
|-----|---------------------------------------------------------------------------------------------------------------------------------------------------------------------------------------------------------------------------------------------------------------------------------------------------------|-------------------|
|     | materials on the initial force of thermoplastic appliances. Angle Orthodontist. 2013;83(3):476-83.                                                                                                                                                                                                      |                   |
| 75  | Lepley CR, Throckmorton GS, Ceen RF, Buschang PH. Relative contributions of occlusion, maximum bite force, and chewing cycle kinematics to masticatory performance. Am J Orthod Dentofac Orthop 2011;139(5):606-13. Epub 2011/05/04.                                                                    | Excluded by title |
| 76  | Martinek CE. The American-Board-of-Orthodontics. Am J Orthod Dentofac Orthop 1954;40(3):189-95.                                                                                                                                                                                                         | Excluded by title |
| 77  | McCoy JD. Report of the American-Board-of-Orthodontics to the American-Association-of-Orthodontists, 1950. Am J Orthod Dentofac Orthop 1950;36(6):465-6.                                                                                                                                                | Excluded by title |
| 78  | McNew BD. Treatment of a patient with a mutilated Class II, Division 1 malocclusion and a dolichofacial skeletal pattern. Am J Orthod Dentofac Orthop 1995;108(5):542-6. Epub 1995/11/01.                                                                                                               | Excluded by title |
| 79  | Meyer DM. Treatment of a crowded Class II malocclusion with significant maxillary incisor protrusion. Am J Orthod Dentofac Orthop 1995;108(1):85-9. Epub 1995/07/01.                                                                                                                                    | Excluded by title |
| 80  | Michaelson P. Management of a severely malpositioned replanted avulsed tooth: a case report. Compendium of continuing education in dentistry (Jamesburg, NJ : 1995). 2013;34(2):e13-9. Epub 2013/05/01.                                                                                                 | Excluded by title |
| 81  | Mincer HH, Harris EF, Berryman HE. The A.B.F.O. study of third molar development and its use as an estimator of chronological age. Journal of Forensic Sciences. 1993;38(2):379-90.                                                                                                                     | Excluded by title |
| 82  | Moffitt AH, Greco PM, Fleisher LD. Appropriate use of the designation of ABO certification: A statement by the American Board of Orthodontics. Am J Orthod Dentofac Orthop 2006;129(4):571-3.                                                                                                           | Excluded by title |
| 83  | Nachbar AS. Nonextraction treatment started in the mixed dentition. An American Board of Orthodontics case report. American journal of orthodontics. 1980;77(1):98-105. Epub 1980/01/01.                                                                                                                | Excluded by title |
| 84  | Noble J, Hechter FJ, Karaiskos NE, Lekic N, Wiltshire WA. Future practice plans of orthodontic residents in the United States. Am J Orthod Dentofac Orthop 2009;135(3):357-60. Epub 2009/03/10.                                                                                                         | Excluded by title |
| 85  | Noble R, English J. Category 7: anteroposterior skeletal discrepancy. Am J Orthod Dentofac Orthop 2006;130(3):403-8.                                                                                                                                                                                    | Excluded by title |
| 86  | Nouri M, Massudi R, Bagheban AA, Azimi S, Fereidooni F. The accuracy of a 3-D laser scanner for crown width measurements. Australian orthodontic journal. 2009;25(1):41-7.                                                                                                                              | Excluded by title |
| 87  | Nurko C. Three-dimensional imaging cone beam computer tomography technology: an update and case report of an impacted incisor in a mixed dentition patient. Pediatric dentistry. 2010;32(4):356-60. Epub 2010/09/15.                                                                                    | Excluded by title |
| 88  | Owens SE, Jr., Dykhouse VJ, Moffitt AH, Grubb JE, Greco PM, English JD, et al. The new American Board of Orthodontics certification process: further clarification. Am J Orthod Dentofac Orthop 2005;128(4):541-4. Epub 2005/10/11.                                                                     | Excluded by title |
| 89  | Owens SE. An American-Board-of-Orthodontics Case-Report. Am J Orthod Dentofac Orthop 1990;97(4):273-81.                                                                                                                                                                                                 | Excluded by title |
| 90  | Park CO, Cho KH. Nonextraction treatment of a Class II Division 1 malocclusion. Am J Orthod Dentofac Orthop 1996;109(3):227-33. Epub 1996/03/01.                                                                                                                                                        | Excluded by title |
| 91  | Paz ME, Subtelny JD, Iranpour B. An American Board of Orthodontics case report. A combined face mask-orthognathic surgical approach in the treatment of skeletal open bite and maxillary deficiency. Am J Orthod Dentofac Orthop 1989;95(1):1-11. Epub 1989/01/01.                                      | Excluded by title |
| 92  | Prezzano WJ. Certification by the American Board of Orthodontics. American journal of orthodontics. 1970;57(3):293-4.                                                                                                                                                                                   | Excluded by title |
| 93  | Price JA, Wright JT, Kula K, Bowden DW, Hart TC. A common DLX3 gene mutation is responsible for tricho-dento-osseous syndrome in Virginia and North Carolina families. Journal of Medical Genetics. 1998;35(10):825-8.                                                                                  | Excluded by title |
| 94  | Rathbone JS. American-Board-of-Orthodontics - Today and Future. Am J Orthod Dentofac Orthop 1976;69(2):185-93.                                                                                                                                                                                          | Excluded by title |
| 95  | Regan PD, Subtelny JD. An American Board of Orthodontics case report. Correction of a severe Class II malocclusion. Am J Orthod Dentofac Orthop 1989;95(3):192-9. Epub 1989/03/01.                                                                                                                      | Excluded by title |
| 96  | Restrep LG, Peláez JF, Tadlock LP. IBC: indice Board CES. CES Odontol. 2014;27(1):106-17.                                                                                                                                                                                                               | Excluded by title |
| 97  | Rhoney DV. ABO certification plan likely to experience new problems. Am J Orthod Dentofac Orthop 2005;128(1):6-7.                                                                                                                                                                                       | Excluded by title |
| 98  | Richmond S, Zhurov A. Quality of Outcome. Evidence-Based Orthodontics. 2011:191-215.                                                                                                                                                                                                                    | Excluded by title |
| 99  | Riolo ML, Vaden JL. Standard of care: Why it is necessary. Am J Orthod Dentofac Orthop 2009;136(4):494-6.                                                                                                                                                                                               | Excluded by title |
| 100 | Roberts WE, Vicilli RF, Chang C, Katona TR, Paydar NH. Biology of biomechanics: Finite element analysis of a statically determinate system to rotate the occlusal plane for correction of a skeletal Class III open-bite malocclusion. Am J Orthod Dentofac Orthop 2015;148(6):943-55. Epub 2015/12/18. | Excluded by title |
| 101 | Roden-Johnson D, English J, Gallerano R. Comparison of hand-traced and computerized cephalograms: landmark identification, measurement, and superimposition accuracy. Am J Orthod Dentofac Orthop 2008;133(4):556-64.                                                                                   | Excluded by title |
| 102 | Rossini G, Parrini S, Castorflorio T, Deregis A, Debernardi CL. Diagnostic accuracy and measurement sensitivity of digital models for orthodontic purposes: A systematic review. Am J Orthod Dentofac Orthop 2016;149(2):161-70. Epub 2016/02/02.                                                       | Excluded by title |
| 103 | Schubert G, Shaughnessy T, Timmis D. Mandibular advancement and reduction genioplasty. Am J Orthod Dentofac Orthop 1990;98(6):481-7. Epub 1990/12/01.                                                                                                                                                   | Excluded by title |
| 104 | Seely DM. An American Board of Orthodontics case report: treatment of a crowded Class II malocclusion in an adult. Am J Orthod Dentofac Orthop 1993;104(3):298-303. Epub 1993/09/01.                                                                                                                    | Excluded by title |
| 105 | Shepard E. The American Board of Orthodontics: milestones of progress. Am J Orthod Dentofac Orthop 1990;98(4):372-5.                                                                                                                                                                                    | Excluded by title |
| 106 | Shepard EE. American Board of Orthodontics. What manner of men were these. Am J Orthod Dentofac Orthop 1991;100(1):80-3. Epub 1991/07/01.                                                                                                                                                               | Excluded by title |
| 107 | Shepard EE. The American-Board-of-Orthodontics - Then and Now. Am J Orthod Dentofac Orthop 1986;89(1):67-9.                                                                                                                                                                                             | Excluded by title |
| 108 | Sheridan JJ. Mock Boards and motivation: the keys to certification by the American Board of Orthodontics. Am J Orthod Dentofac Orthop 1993;103(4):380-1. Epub 1993/04/01.                                                                                                                               | Excluded by title |
| 109 | Smith GA. Treatment of an adult with a severe anterior open bite and mutilated malocclusion without orthognathic surgery. Am J Orthod Dentofac Orthop 1996;110(6):682-7. Epub 1996/12/01.                                                                                                               | Excluded by title |
| 110 | Smith SW, English JD. Orthodontic correction of a class III malocclusion in an adolescent patient with a bonded RPE and protraction face mask. Am J Orthod Dentofac Orthop 1999;116(2):177-83. Epub 1999/08/06.                                                                                         | Excluded by title |
| 111 | Snyder EP, Subtelny JD. An American Board of Orthodontics case report. Orthodontic treatment of a patient born with a severe right unilateral cleft lip and palate. Am J Orthod Dentofac Orthop 1989;95(4):273-81. Epub 1989/04/01.                                                                     | Excluded by title |
| 112 | Snyder RJ. Class II malocclusion correction: an American board of orthodontics case. Am J Orthod Dentofac Orthop 1999;116(4):424-9. Epub 1999/10/08.                                                                                                                                                    | Excluded by title |
| 113 | Stevens DR, Flores-Mir C, Nebbe B, Raboud DW, Heo G, Major PW. Validity, reliability, and reproducibility of plaster vs digital study models: comparison of peer assessment rating and Bolton analysis and their constituent measurements. Am J Orthod                                                  | Excluded by title |

|     |                                                                                                                                                                                                                                                                                                  |                      |
|-----|--------------------------------------------------------------------------------------------------------------------------------------------------------------------------------------------------------------------------------------------------------------------------------------------------|----------------------|
|     | Dentofac Orthop 2006;129(6):794-803. Epub 2006/06/14.                                                                                                                                                                                                                                            |                      |
| 114 | Tavares CA, Allgayer S, Calvete Eda S, Polido WD. Orthodontic treatment for a patient with advanced periodontal disease: 11-year follow-up. Am J Orthod Dentofac Orthop 2013;144(3):455-65. Epub 2013/09/03.                                                                                     | Excluded by title    |
| 115 | Tipton NJ. Category 7: Class II skeletal malocclusion with transverse maxillary constriction in an adult patient. Am J Orthod Dentofac Orthop 2005;128(4):528-34. Epub 2005/10/11.                                                                                                               | Excluded by title    |
| 116 | Turley PK. An American Board of Orthodontics case report: the surgical-orthodontic management of a Class I malocclusion with excessive overbite and periodontal bone loss. Am J Orthod Dentofac Orthop 1993;104(4):402-10. Epub 1993/10/01.                                                      | Excluded by title    |
| 117 | Vaughan JL. Orthodontic correction of an adult Angle Class II Division 2 deep bite. Am J Orthod Dentofac Orthop 1999;116(1):75-81.                                                                                                                                                               | Excluded by title    |
| 118 | Vaught RA. Treatment of a Class II Division 1 malocclusion with a high mandibular angle. Am J Orthod Dentofac Orthop 2000;118(3):341-6. Epub 2000/09/13.                                                                                                                                         | Excluded by title    |
| 119 | Vaught RA. Treatment of a Class II Division 1 malocclusion. Am J Orthod Dentofac Orthop 2000;118(2):229-33.                                                                                                                                                                                      | Excluded by title    |
| 120 | Veenema AC, Katsaros C, Boxum SC, Bronkhorst EM, Kuijpers-Jagtman AM. Index of Complexity, Outcome and Need scored on plaster and digital models. European journal of orthodontics. 2009;31(3):281-6.                                                                                            | Excluded by title    |
| 121 | Wade DB. ABO certification: a worthy goal. Am J Orthod Dentofac Orthop 1993;103(5):478. Epub 1993/05/01.                                                                                                                                                                                         | Excluded by title    |
| 122 | Wahl N. Orthodontics in 3 millennia. Chapter 2: Entering the modern era. Am J Orthod Dentofac Orthop 2005;127(4):510-5.                                                                                                                                                                          | Excluded by title    |
| 123 | Webster RL. Report of the President of the American Board of Orthodontics to the Directors of the American-Association-of-Orthodontists. Am J Orthod Dentofac Orthop 1954;40(10):793-5.                                                                                                          | Excluded by title    |
| 124 | White OW. Report of the American-Board-of-Orthodontics. Am J Orthod Dentofac Orthop 1948;34(12):1027-8.                                                                                                                                                                                          | Excluded by title    |
| 125 | Zhang N, Bai YX, Ding XJ, Zhang Y. Preparation and characterization of thermoplastic materials for invisible orthodontics. Dent Mater J. 2011;30(6):954-9.                                                                                                                                       | Excluded by title    |
| 126 | Wiranto MG, Engelbrecht WP, Nolthenius HET, van der Meer WJ, Ren YJ. Validity, reliability, and reproducibility of linear measurements on digital models obtained from intraoral and cone-beam computed tomography scans of alginate impressions. Am J Orthod Dentofac Orthop 2013;143(1):140-7. | Excluded by title    |
| 127 | Alexander JM. Category 6: Class II Division 1 malocclusion treated with extraction of permanent teeth. Am J Orthod Dentofac Orthop 2005;128(5):661-8. Epub 2005/11/16.                                                                                                                           | Excluded by abstract |
| 128 | Cangialosi TJ, Riolo ML, Owens SE, Jr., Dykhouse VJ, Moffitt AH, Grubb JE, et al. The ABO discrepancy index: a measure of case complexity. Am J Orthod Dentofac Orthop 2004;125(3):270-8. Epub 2004/03/12.                                                                                       | Excluded by abstract |
| 129 | Cangialosi TJ, Riolo ML, Owens SE, Jr., Dykhouse VJ, Moffitt AH, Grubb JE, et al. The American Board of Orthodontics and specialty certification: the first 50 years. Am J Orthod Dentofac Orthop 2004;126(1):3-6. Epub 2004/06/30.                                                              | Excluded by abstract |
| 130 | Casko JS, Vaden JL, Kokich VG, Damone J, James RD, Cangialosi TJ, et al. Objective grading system for dental casts and panoramic radiographs. American Board of Orthodontics. Am J Orthod Dentofac Orthop 1998;114(5):589-99.                                                                    | Excluded by abstract |
| 131 | Collins SM, Poulton DR. Orthodontic and orthognathic surgical correction of Class III malocclusion. Am J Orthod Dentofac Orthop 1996;109(2):111-5. Epub 1996/02/01.                                                                                                                              | Excluded by abstract |
| 132 | Cope JB, McFadden D. Temporary replacement of missing maxillary lateral incisors with orthodontic miniscrew implants in growing patients: rationale, clinical technique, and long-term results. Journal of orthodontics. 2014;41 Suppl 1:s62-74. Epub 2014/08/21.                                | Excluded by abstract |
| 133 | Dragstrem K, Galang-Boquiren MT, Obrez A, Costa Viana MG, Grubb JE, Kusnoto B. Accuracy of digital American Board of Orthodontics Discrepancy Index measurements. Am J Orthod Dentofac Orthop 2015;148(1):60-6. Epub 2015/07/01.                                                                 | Excluded by abstract |
| 134 | Dyken RA, Sadowsky PL, Hurst D. Orthodontic outcomes assessment using the peer assessment rating index. The Angle orthodontist. 2001;71(3):164-9. Epub 2001/06/16.                                                                                                                               | Excluded by abstract |
| 135 | Dykhouse VJ, Moffitt AH, Grubb JE, Greco PM, English JD, Briss BS, et al. A report of the ABO Resident Clinical Outcome Study (the pilot study). Am J Orthod Dentofac Orthop 2006;130(5):656-61. Epub 2006/11/18.                                                                                | Excluded by abstract |
| 136 | Edgren B. Category 5: Class II Division 1 malocclusion with a high mandibular plane angle. Am J Orthod Dentofac Orthop 2006;130(2):236-43. Epub 2006/08/15.                                                                                                                                      | Excluded by abstract |
| 137 | Fooladi B, MacCarthy T, Maloney T, Suri L. Category 4: Class II Division 2 malocclusion with deep overbite. Am J Orthod Dentofac Orthop 2007;132(2):252-9. Epub 2007/08/19.                                                                                                                      | Excluded by abstract |
| 138 | Ghosh J, Nanda RS. Class II, Division 1 malocclusion treated with molar distalization therapy. Am J Orthod Dentofac Orthop 1996;110(6):672-7. Epub 1996/12/01.                                                                                                                                   | Excluded by abstract |
| 139 | Hilgers KK, Redford-Badwal D, Reisine S. Orthodontic treatment provided by pediatric dentists. Am J Orthod Dentofac Orthop 2003;124(5):551-60. Epub 2003/11/14.                                                                                                                                  | Excluded by abstract |
| 140 | Israel M, Kusnoto B, Evans CA, Begole E. A comparison of traditional and computer-aided bracket placement methods. The Angle orthodontist. 2011;81(5):828-35. Epub 2011/04/29.                                                                                                                   | Excluded by abstract |
| 141 | Krivan JF. Category 2: Skeletal Class II malocclusion with retrognathic mandible and hyperdivergent pattern. Am J Orthod Dentofac Orthop 2005;127(6):739-48. Epub 2005/06/15.                                                                                                                    | Excluded by abstract |
| 142 | Lemay M. Logistics in digital orthodontic models. International journal of orthodontics (Milwaukee, Wis). 2007;18(4):25-8.                                                                                                                                                                       | Excluded by abstract |
| 143 | Lima Filho RM, Lima AL, de Oliveira Ruellas AC. Longitudinal study of anteroposterior and vertical maxillary changes in skeletal class II patients treated with Kloehe cervical headgear. The Angle orthodontist. 2003;73(2):187-93. Epub 2003/05/03.                                            | Excluded by abstract |
| 144 | Liu SQ, Shen G, Bai D, Zhou H, Li S, Chen WJ, et al. [Consistency of the subjective evaluation of malocclusion severity by the Chinese orthodontic experts]. Beijing da xue xue bao Yi xue ban = Journal of Peking University Health sciences. 2012;44(1):98-102. Epub 2012/02/23.               | Excluded by abstract |
| 145 | Maganzini AL, Schroetter SB, Freeman K. Improvement in smile esthetics following orthodontic treatment: a retrospective study utilizing standardized smile analysis. The Angle orthodontist. 2014;84(3):492-9. Epub 2013/11/14.                                                                  | Excluded by abstract |
| 146 | Maggioncalda EA. Treatment of a Class II, division 1 vertical growth pattern with severe anterior crowding. Am J Orthod Dentofac Orthop 1997;112(3):300-8. Epub 1997/09/19.                                                                                                                      | Excluded by abstract |
| 147 | Owens SE, Jr., Dykhouse VJ, Moffitt AH, Grubb JE, Greco PM, English JD, et al. The case management form of the American Board of Orthodontics. Am J Orthod Dentofac Orthop 2006;129(3):325-9. Epub 2006/03/11.                                                                                   | Excluded by abstract |
| 148 | Parrish LD, Roberts WE, Maupome G, Stewart KT, Bandy RW, Kula KS. The relationship between the ABO discrepancy index and treatment duration in a graduate orthodontic clinic. The Angle orthodontist. 2011;81(2):192-7. Epub 2011/01/07.                                                         | Excluded by abstract |
| 149 | Rheude B, Sadowsky PL, Ferriera A, Jacobson A. An evaluation of the use of digital study models in orthodontic diagnosis                                                                                                                                                                         | Excluded by abstract |

|                       |                                                                                                                                                                                                                                                                                                   |                                  |
|-----------------------|---------------------------------------------------------------------------------------------------------------------------------------------------------------------------------------------------------------------------------------------------------------------------------------------------|----------------------------------|
|                       | and treatment planning. <i>The Angle orthodontist</i> . 2005;75(3):300-4. Epub 2005/05/19.                                                                                                                                                                                                        |                                  |
| 150                   | Riolo ML, Owens SE, Dykhouse VJ, Moffitt AH, Grubb JE, Greco PM, et al. ABO resident clinical outcomes study: case complexity as measured by the discrepancy index. <i>Am J Orthod Dentofac Orthop</i> 2005;127(2):161-3. Epub 2005/03/08.                                                        | Excluded by abstract             |
| 151                   | Riolo ML, Owens SE, Jr., Dykhouse VJ, Moffitt AH, Grubb JE, Greco PM, et al. A change in the certification process by the American Board of Orthodontics. <i>Am J Orthod Dentofac Orthop</i> 2005;127(3):278-81. Epub 2005/03/19.                                                                 | Excluded by abstract             |
| 152                   | Riolo ML, Owens SE, Jr., Dykhouse VJ, Moffitt AH, Grubb JE, Greco PM, et al. The American Board of Orthodontics: Diplomate recertification. <i>Am J Orthod Dentofac Orthop</i> 2004;126(6):650-4. Epub 2004/12/14.                                                                                | Excluded by abstract             |
| 153                   | Roberts CA, Subtelny JD. An American Board of Orthodontics case report. Use of the face mask in the treatment of maxillary skeletal retrusion. <i>Am J Orthod Dentofac Orthop</i> 1988;93(5):388-94. Epub 1988/05/01.                                                                             | Excluded by abstract             |
| 154                   | Schafer SM, Maupome G, Eckert GJ, Roberts WE. Discrepancy index relative to age, sex, and the probability of completing treatment by one resident in a 2-year graduate orthodontics program. <i>Am J Orthod Dentofac Orthop</i> 2011;139(1):70-3.                                                 | Excluded by abstract             |
| 155                   | Scott SA, Freer TJ. Visual application of the American Board of Orthodontics Grading System. <i>Australian orthodontic journal</i> . 2005;21(1):55-60. Epub 2006/01/26.                                                                                                                           | Excluded by abstract             |
| 156                   | Tahir E, Sadowsky C, Schneider BJ. An assessment of treatment outcome in American Board of Orthodontics cases. <i>Am J Orthod Dentofac Orthop</i> 1997;111(3):335-42. Epub 1997/03/01.                                                                                                            | Excluded by abstract             |
| 157                   | Westerlund A, Tancredi W, Ransjo M, Bresin A, Psonis S, Torgersson O. Digital casts in orthodontics: a comparison of 4 software systems. <i>Am J Orthod Dentofac Orthop</i> 2015;147(4):509-16. Epub 2015/04/04.                                                                                  | Excluded by abstract             |
| 158                   | Whitley JB, Jr. A Class II, Division 1 malocclusion: A malocclusion with a significant mandibular arch length deficiency. <i>Am J Orthod Dentofac Orthop</i> 1996;110(6):688-93. Epub 1996/12/01.                                                                                                 | Excluded by abstract             |
| 159                   | Lin KY, Goldberg D, Williams C, Borowitz K, Persing J, Edgerton M, et al. Long-term outcome analysis of two treatment methods for cleft palate: Combined levator retropositioning and pharyngeal flap versus double-opposing Z-plasty. <i>Cleft Palate-Craniofacial Journal</i> . 1999;36(5):462. | Excluded by abstract             |
| 160                   | Maruo IT, Maruo H, Saga AY, de Oliveira DD, Argenta MA, Tanaka OM. Tridimensional finite element analysis of teeth movement induced by different headgear forces. <i>Progress in orthodontics</i> . 2016;17(1).                                                                                   | Excluded by abstract             |
| 161                   | Bootvong K, Liu Z, McGrath C, Hagg U, Wong RWK, Bendeus M, et al. Virtual model analysis as an alternative approach to plaster model analysis: reliability and validity. <i>European journal of orthodontics</i> . 2010;32(5):589-95.                                                             | Excluded by abstract             |
| 162                   | Bressler JM, Hamamoto S, King GJ, Bollen AM. Invisalign Therapy-A Systematic Review of Lower Quality Evidence. <i>Evidence-Based Orthodontics</i> . 2011:167-80.                                                                                                                                  | Excluded by abstract             |
| 163                   | Cubas YP, Hardy D, Dhilon DK, Orellana MF. Effectiveness of Training Dental Students in Two Occlusal Indices. <i>J Dent Educ</i> . 2012;76(6):739-45.                                                                                                                                             | Excluded by abstract             |
| 164                   | de Freitas KMS, Janson G, de Freitas MR, Pinzan A, Henriques JFC, Pinzan-Vercelino CRM. Influence of the quality of the finished occlusion on postretention occlusal relapse. <i>Am J Orthod Dentofac Orthop</i> 2007;132(4):U29-U34.                                                             | Excluded by abstract             |
| 165                   | Grunheid T, Gaalaas S, Hamdan H, Larson BE. Effect of clear aligner therapy on the buccolingual inclination of mandibular canines and the intercanine distance. <i>Angle Orthodontist</i> . 2016;86(1):10-6.                                                                                      | Excluded by abstract             |
| 166                   | Janson G, de Souza JEP, Alves FD, Andrade P, Nakamura A, de Freitas MR, et al. Extreme dentoalveolar compensation in the treatment of Class III malocclusion. <i>Am J Orthod Dentofac Orthop</i> 2005;128(6):787-94.                                                                              | Excluded by abstract             |
| 167                   | Kau CH, Littlefield J, Rainy N, Nguyen JT, Creed B. Evaluation of CBCT Digital Models and Traditional Models Using the Little's Index. <i>Angle Orthodontist</i> . 2010;80(3):435-9.                                                                                                              | Excluded by abstract             |
| 168                   | Klein DJ. The mandibular central incisor, an extraction option. <i>Am J Orthod Dentofac Orthop</i> 1997;111(3):253-9.                                                                                                                                                                             | Excluded by abstract             |
| 169                   | Kravitz ND, Kusnoto B, BeGole E, Obrez A, Agran B. How well does Invisalign work? A prospective clinical study evaluating the efficacy of tooth movement with Invisalign. <i>Am J Orthod Dentofac Orthop</i> 2009;135(1):27-35.                                                                   | Excluded by abstract             |
| 170                   | Lee RJ, Weissheimer A, Pham J, Go L, de Menezes LM, Redmond WR, et al. Three-dimensional monitoring of root movement during orthodontic treatment. <i>Am J Orthod Dentofac Orthop</i> 2015;147(1):132-42.                                                                                         | Excluded by abstract             |
| 171                   | Mok CW, Zhou L, McGrath C, Hagg U, Bendeus M. Digital images as an alternative to orthodontic casts in assessing malocclusion and orthodontic treatment need. <i>Acta Odontol Scand</i> . 2007;65(6):362-8.                                                                                       | Excluded by abstract             |
| 172                   | Noar JH, Sharma S, Roberts-Harry D, Qureshi T. A discerning approach to simple aesthetic orthodontics. <i>Br Dent J</i> . 2015;218(3):157-66.                                                                                                                                                     | Excluded by abstract             |
| 173                   | Radeke J, von der Wense C, Lapatki BG. Comparison of orthodontic measurements on dental plaster casts and 3D scans. <i>J Orofac Orthop</i> . 2014;75(4):264-74.                                                                                                                                   | Excluded by abstract             |
| 174                   | Shastry S, Park JH. Evaluation of the use of digital study models in postgraduate orthodontic programs in the United States and Canada. <i>Angle Orthodontist</i> . 2014;84(1):62-7.                                                                                                              | Excluded by abstract             |
| 175                   | Song GY, Zhao ZH, Ding Y, Bai YX, Wang L, He H, et al. Reliability assessment and correlation analysis of evaluating orthodontic treatment outcome in Chinese patients. <i>Int J Oral Sci</i> . 2014;6(1):50-5.                                                                                   | Excluded by abstract             |
| 176                   | Tuncer C, Bavbek NC, Tuncer BB, Bani AA, Celik B. How Do Patients and Parents Decide for Orthodontic Treatment-Effects of Malocclusion, Personal Expectations, Education and Media. <i>J Clin Pediatr Dent</i> . 2015;39(4):392-9.                                                                | Excluded by abstract             |
| 177                   | White AJ, Fallis DW, Vandewalle KS. Analysis of intra-arch and interarch measurements from digital models with 2 impression materials and a modeling process based on cone-beam computed tomography. <i>Am J Orthod Dentofac Orthop</i> 2010;137(4).                                              | Excluded by abstract             |
| 178                   | Wohl TS, Bamonte E, Pearson HE. Nonextraction treatment of unilateral Class II, Division 1 malocclusion with asymmetric headgear. <i>Am J Orthod Dentofac Orthop</i> 1998;113(5):483-7.                                                                                                           | Excluded by abstract             |
| 179                   | Quinn B. Considerations in case acceptance for ABO Phase III examination. <i>Am J Orthod Dentofac Orthop</i> 2004;126(4):20A; author reply A-1A.                                                                                                                                                  | Excluded by abstract             |
| 180                   | Medina VJ. Tipo sde aparelhos ortopédicos usados em pacientes que apresentam mesioclusão funcional. 2006:88-.                                                                                                                                                                                     | Excluded by abstract             |
| Excluded by full-text |                                                                                                                                                                                                                                                                                                   |                                  |
| 181                   | Condie JH. Evaluation of the University at Buffalo orthodontic resident's finished cases with the American Board of Orthodontics Discrepancy Index and Objective Grading System. 2010, University of Buffalo, Thesis.                                                                             | Excluded; full-text unobtainable |
| 182                   | Cook MK. Evaluation of Board-certified orthodontist's sequential finished cases with the ABO objective grading system. <i>Orthodontics</i> . Saint Louis: Saint Louis University; 2003: p. 56.                                                                                                    | Excluded; full-text unobtainable |
| 183                   | Cordua T, Ursini R, Giuliane L, Deli R. The excellence challenge in orthodontics: clinical use of an objective grading system for orthodontic cases. <i>Progress in orthodontics</i> . 2009;10(2):4-15. Epub 2009/01/01.                                                                          | Excluded; full-text unobtainable |
| 184                   | Fetouh O. Comparison of treatment outcome of Invisalign(RTM) and traditional fixed orthodontics by model analysis using                                                                                                                                                                           | Excluded; full-text              |

|     |                                                                                                                                                                                                                                                                               |                                        |
|-----|-------------------------------------------------------------------------------------------------------------------------------------------------------------------------------------------------------------------------------------------------------------------------------|----------------------------------------|
|     | ABO Objective Grading System. STATE UNIVERSITY OF NEW YORK AT BUFFALO, 2009, 50 pages; 1461733.                                                                                                                                                                               | unobtainable                           |
| 185 | Palmer M. Variables affecting treatment outcomes in a 30-month post-graduate orthodontic residency. 2012, Thesis, Nova Southeastern University.                                                                                                                               | Excluded; full-text unobtainable       |
| 186 | Rangwala T. Treatment outcome assessment of SureSmile compared to conventional orthodontic treatment using the American Board of Orthodontics Grading System. 2012 - Thesis at Albert Einstein College of                                                                     | Excluded; full-text unobtainable       |
| 187 | Song GY, Jiang RP, Zhang XY, Liu SQ, Yu XN, Chen Q, et al. [Validation of subjective and objective evaluation methods for orthodontic treatment outcome]. Beijing da xue xue bao Yi xue ban = Journal of Peking University Health sciences. 2015;47(1):90-7. Epub 2015/02/17. | Excluded; full-text unobtainable       |
| 188 | Yang-Powers LC. Treatment outcome in a university graduate orthodontic clinic using the ABO grading system [dissertation]. Chicago: University of Illinois at Chicago; 2001.                                                                                                  | Excluded; full-text unobtainable       |
| 189 | Yilmaz RBN, Nalbantgil D, Ozdemir F. The Effect of Awareness of American Board of Orthodontics Criteria on Treatment Outcomes in a Postgraduate Dental Clinic. J Dent Educ. 2016;80(9):1091-7.                                                                                | Excluded; full-text unobtainable       |
| 190 | Murakami K, Deguchi T, Hashimoto T, Imai M, Miyawaki S, Takano-Yamamoto T. Need for training sessions for orthodontists in the use of the American Board of Orthodontics objective grading system. Am J Orthod Dentofac Orthop 2007;132(4):427 e1-6. Epub 2007/10/09.         | Excluded; not a clinical study         |
| 191 | Bergersen EO. A cephalometric study of the clinical use of the mandibular labial bumper. American journal of orthodontics. 1972;61(6):578-602.                                                                                                                                | Excluded; ABO OGS not used             |
| 192 | Sachdeva RC, Aranha SL, Egan ME, Gross HT, Sachdeva NS, Currier GF, Kadioglu O. Treatment time: SureSmile vs conventional. Orthodontics (Chic.). 2012;13(1):72-85.                                                                                                            | Excluded; ABO OGS not used             |
| 193 | Silva LNBC. Estudo comparativo do tempo de tratamento em pacientes com e sem apinhamento nos casos de má oclusão de Classe II tratados com extrações de quatro pré-molares. Thesis, Faculdade de Odontologia de Bauru, 2013                                                   | Excluded; ABO OGS not used             |
| 194 | Vasilakou ND. Quantitative assessment of the effectiveness of phase 1 orthodontic treatment utilizing the ABO discrepancy index. Saint Louis University , Thesis, 2014.                                                                                                       | Excluded; ABO OGS not used             |
| 195 | Abel Y, Nelson S, Amberman BD, Hans MG. Comparing orthodontic treatment outcome between orthodontists and general dentists with the ABO index. Am J Orthod Dentofac Orthop 2004;126(5):544-8. Epub 2004/11/03.                                                                | Excluded; not all ABO OGS items scored |
| 196 | Bauss O, Kiliaridis S. Evaluation of tooth position, occlusion, and interproximal contacts after transplantation of immature third molars. European journal of orthodontics. 2009;31(2):121-8. Epub 2008/12/09.                                                               | Excluded; not all ABO OGS items scored |
| 197 | Buschang PH, Ross M, Shaw SG, Crosby D, Campbell PM. Predicted and actual end-of-treatment occlusion produced with aligner therapy. Angle Orthodontist. 2015;85(5):723-7.                                                                                                     | Excluded; not all ABO OGS items scored |
| 198 | Cameron DL. The relationship between American Board of Orthodontics pretreatment dental cast Discrepancy Index scores and posttreatment dental cast Objective Grading System scores. Thesis, Saint Louis, 2010.                                                               | Excluded; not all ABO OGS items scored |
| 199 | Chaison ET, Liu X, Tuncay OC. The quality of treatment in the adult orthodontic patient as judged by orthodontists and measured by the Objective Grading System. Am J Orthod Dentofac Orthop 2011;139(4 Suppl):S69-75. Epub 2011/04/01.                                       | Excluded; not all ABO OGS items scored |
| 200 | Cook DR, Harris EF, Vaden JL. Comparison of university and private-practice orthodontic treatment outcomes with the American Board of Orthodontics objective grading system. Am J Orthod Dentofac Orthop 2005;127(6):707-12.                                                  | Excluded; not all ABO OGS items scored |
| 201 | Costalos PA, Sarraf K, Cangialosi TJ, Efstratiadis S. Evaluation of the accuracy of digital model analysis for the American Board of Orthodontics objective grading system for dental casts. Am J Orthod Dentofac Orthop 2005;128(5):624-9.                                   | Excluded; not all ABO OGS items scored |
| 202 | Fabels LN, Nijkamp PG. Interexaminer and intraexaminer reliabilities of 3-dimensional orthodontic digital setups. Am J Orthod Dentofac Orthop 2014;146(6):806-11. Epub 2014/11/30.                                                                                            | Excluded; not all ABO OGS items scored |
| 203 | Fleming J. An analysis of variability in Class I non-extraction treatment outcomes in a resident clinic using the American Board of Orthodontics Objective Grading System. Masters Thesis. Saint Louis: Saint Louis University; 2006.                                         | Excluded; not all ABO OGS items scored |
| 204 | Greco PM, English JD, Briss BS, Jamieson SA, Kastrop MC, Castelein PT, et al. Posttreatment tooth movement: for better or for worse. Am J Orthod Dentofac Orthop 2010;138(5):552-8. Epub 2010/11/09.                                                                          | Excluded; not all ABO OGS items scored |
| 205 | Hildebrand JC, Palomo JM, Palomo L, Sivik M, Hans M. Evaluation of a software program for applying the American Board of Orthodontics objective grading system to digital casts. Am J Orthod Dentofac Orthop 2008;133(2):283-9. Epub 2008/02/06.                              | Excluded; not all ABO OGS items scored |
| 206 | Im J, Cha JY, Lee KJ, Yu HS, Hwang CJ. Comparison of virtual and manual tooth setups with digital and plaster models in extraction cases. Am J Orthod Dentofac Orthop 2014;145(4):434-42. Epub 2014/04/08.                                                                    | Excluded; not all ABO OGS items scored |
| 207 | Lassaire J, Costi A, Charpentier E, Castro M. Post-orthodontic intra- and interarch changes at 1 year: a retrospective study assessing the impact of anterior fixed retention. International orthodontics . 2012;10(2):165-76.                                                | Excluded; not all ABO OGS items scored |
| 208 | Lee SM, Lee JW. Computerized occlusal analysis: correlation with occlusal indexes to assess the outcome of orthodontic treatment or the severity of malocclusion. Korean J Orthod. 2016;46(1):27-35.                                                                          | Excluded; not all ABO OGS items scored |
| 209 | Lieber WS, Carlson SK, Baumrind S, Poulton DR. Clinical use of the ABO-Scoring Index: reliability and subtraction frequency. The Angle orthodontist. 2003;73(5):556-64. Epub 2003/10/29.                                                                                      | Excluded; not all ABO OGS items scored |
| 210 | Ling KK, Ho CT, Kravchuk O, Olive RJ. Comparison of surgical and non-surgical methods of treating palatally impacted canines. II. Aesthetic outcomes. Australian orthodontic journal. 2007;23(1):8-15. Epub 2007/08/08.                                                       | Excluded; not all ABO OGS items scored |
| 211 | Lyotard N, Hans M, Nelson S, Valiathan M. Short-term postorthodontic changes in the absence of retention. The Angle orthodontist. 2010;80(6):1045-50. Epub 2010/08/04.                                                                                                        | Excluded; not all ABO OGS items scored |
| 212 | Nett BC, Huang GJ. Long-term posttreatment changes measured by the American Board of Orthodontics objective grading system. Am J Orthod Dentofac Orthop 2005;127(4):444-50; quiz 516. Epub 2005/04/12.                                                                        | Excluded; not all ABO OGS items scored |
| 213 | Okunami TR, Kusnoto B, BeGole E, Evans CA, Sadowsky C, Fadavi S. Assessing the American Board of Orthodontics objective grading system: digital vs plaster dental casts. Am J Orthod Dentofac Orthop 2007;131(1):51-6. Epub 2007/01/09.                                       | Excluded; not all ABO OGS items scored |
| 214 | Onyeaso CO, BeGole EA. Associations between pretreatment age and treatment time with orthodontic treatment outcome: a comparison by means of two orthodontic indices. Hell Orthod Rev. 2008;1:8-20.                                                                           | Excluded; not all ABO OGS items scored |
| 215 | Onyeaso CO, Begole EA. Relationship between index of complexity, outcome and need, dental aesthetic index, peer assessment rating index, and American Board of Orthodontics objective grading system. Am J Orthod Dentofac Orthop 2007;131(2):248-52. Epub 2007/02/06.        | Excluded; not all ABO OGS items scored |
| 216 | Ormiston JP, Huang GJ, Little RM, Decker JD, Seuk GD. Retrospective analysis of long-term stable and unstable orthodontic treatment outcomes. Am J Orthod Dentofac Orthop 2005;128(5):568-74; quiz 669. Epub 2005/11/16.                                                      | Excluded; not all ABO OGS items scored |
| 217 | Saxe AK, Louie LJ, Mah J. Efficiency and effectiveness of SureSmile. World journal of orthodontics. 2010;11(1):16-22.                                                                                                                                                         | Excluded; not all ABO OGS items scored |

|          |                                                                                                                                                                                                                                                                                                              |                                        |
|----------|--------------------------------------------------------------------------------------------------------------------------------------------------------------------------------------------------------------------------------------------------------------------------------------------------------------|----------------------------------------|
| 218      | Son WS, Cha KS, Chung DH, Kim TW. Quantitative evaluation and affecting factors of post-treatment relapse tendency. Korean J Orthod. 2011;41(3):154-63.                                                                                                                                                      | Excluded; not all ABO OGS items scored |
| 219      | Song GY, Baumrind S, Zhao ZH, Ding Y, Bai YX, Wang L, et al. Validation of the American Board of Orthodontics Objective Grading System for assessing the treatment outcomes of Chinese patients. Am J Orthod Dentofac Orthop 2013;144(3):391-7.                                                              | Excluded; not all ABO OGS items scored |
| 220      | Stock GJ, McNamara JA, Jr., Baccetti T. Efficacy of 2 finishing protocols in the quality of orthodontic treatment outcome. Am J Orthod Dentofac Orthop 2011;140(5):688-95. Epub 2011/11/05.                                                                                                                  | Excluded; not all ABO OGS items scored |
| 221      | Struble BH, Huang GJ. Comparison of prospectively and retrospectively selected American Board of Orthodontics cases. Am J Orthod Dentofac Orthop 2010;137(1):6 e1-8; discussion 6-8. Epub 2010/02/04.                                                                                                        | Excluded; not all ABO OGS items scored |
| 222      | Vincent S. Evaluation of Invisalign treatment utilizing the American Board of Orthodontics Objective Grading System for dental casts. Oregon Health & Science University, Thesis, 2014.                                                                                                                      | Excluded; not all ABO OGS items scored |
| 223      | Wes Fleming J, Buschang PH, Kim KB, Oliver DR. Posttreatment occlusal variability among angle Class I nonextraction patients. The Angle orthodontist. 2008;78(4):625-30. Epub 2008/02/28.                                                                                                                    | Excluded; not all ABO OGS items scored |
| Included |                                                                                                                                                                                                                                                                                                              |                                        |
| 224      | Akinci Cansunar H, Uysal T. Comparison of orthodontic treatment outcomes in nonextraction, 2 maxillary premolar extraction, and 4 premolar extraction protocols with the American Board of Orthodontics objective grading system. Am J Orthod Dentofac Orthop 2014;145(5):595-602. Epub 2014/05/03.          | Included                               |
| 225      | Alford TJ, Roberts WE, Hartsfield JK, Eckert GJ, Snyder RJ. Clinical outcomes for patients finished with the SureSmile (TM) method compared with conventional fixed orthodontic therapy. Angle Orthodontist. 2011;81(3):383-8.                                                                               | Included                               |
| 226      | Anthopoulou C, Konstantonis D, Makou M. Treatment outcomes after extraction and nonextraction treatment evaluated with the American Board of Orthodontics objective grading system. Am J Orthod Dentofac Orthop 2014;146(6):717-23.                                                                          | Included                               |
| 227      | Aszkler RM, Preston CB, Saltaji H, Tabbaa S. Long-term occlusal changes assessed by the American Board of Orthodontics' model grading system. Am J Orthod Dentofac Orthop 2014;145(2):173-8. Epub 2014/02/04.                                                                                                | Included                               |
| 228      | Barbosa Lis DM, Zapata Noreña O, Carvajal A, Franco CM, Rodriguez Aguirre SA, Florez Pino AA, et al. Resultado de Tratamientos Ortodóncicos y su Relación con la Complejidad de la Maloclusión. Int j odontostomatol (Print). 2014;8(2):201-6.                                                               | Included                               |
| 229      | Brown MW, Koroluk L, Ko CC, Zhang K, Chen M, Nguyen T. Effectiveness and efficiency of a CAD/CAM orthodontic bracket system. Am J Orthod Dentofac Orthop 2015;148(6):1067-74. Epub 2015/12/18.                                                                                                               | Included                               |
| 230      | Brown PN, Kulbersh R, Kaczynski R. Clinical outcomes assessment of consecutively finished patients in a 24-month orthodontic residency: a 5-year perspective. Am J Orthod Dentofac Orthop 2011;139(5):665-8. Epub 2011/05/04.                                                                                | Included                               |
| 231      | Campbell CL, Roberts WE, Hartsfield JK, Jr., Qi R. Treatment outcomes in a graduate orthodontic clinic for cases defined by the American Board of Orthodontics malocclusion categories. Am J Orthod Dentofac Orthop 2007;132(6):822-9.                                                                       | Included                               |
| 232      | Cansunar HA, Uysal T. Outcomes of different Class II treatments Comparisons using the American Board of Orthodontics Model Grading System. J Orofac Orthop. 2016;77(4):233-41.                                                                                                                               | Included                               |
| 233      | Cansunar HA, Uysal T. Relationship between pretreatment case complexity and orthodontic clinical outcomes determined by the American Board of Orthodontics criteria. The Angle orthodontist. 2014;84(6):974-9. Epub 2014/04/04.                                                                              | Included                               |
| 234      | Carvajal-Flórez A, Barbosa-Lis DM, Zapata-Noreña OA, Marín-Velásquez JA, Afanador-Bayona SA. Orthodontic treatment outcomes obtained by application of a finishing protocol. Dental Press J Orthod. 2016;21(2):88-94.                                                                                        | Included                               |
| 235      | Chalabi O, Preston CB, Al-Jewair TS, Tabbaa S. A comparison of orthodontic treatment outcomes using the Objective Grading System (OGS) and the Peer Assessment Rating (PAR) index. Australian orthodontic journal. 2015;31(2):157-64.                                                                        | Included                               |
| 236      | Deguchi T, Honjo T, Fukunaga T, Miyawaki S, Roberts WE, Takano-Yamamoto T. Clinical assessment of orthodontic outcomes with the peer assessment rating, discrepancy index, objective grading system, and comprehensive clinical assessment. Am J Orthod Dentofac Orthop 2005;127(4):434-43. Epub 2005/04/12. | Included                               |
| 237      | Deguchi T, Kurosaka H, Oikawa H, Kuroda S, Takahashi I, Yamashiro T, et al. Comparison of orthodontic treatment outcomes in adults with skeletal open bite between conventional edgewise treatment and implant-anchored orthodontics. Am J Orthod Dentofac Orthop 2011;139(4 Suppl):S60-8. Epub 2011/04/01.  | Included                               |
| 238      | Deguchi T, Terao F, Aonuma T, Kataoka T, Sugawara Y, Yamashiro T, et al. Outcome assessment of lingual and labial appliances compared with cephalometric analysis, peer assessment rating, and objective grading system in Angle Class II extraction cases. Angle Orthodontist. 2015;85(3):400-7.            | Included                               |
| 239      | Detterline DA, Isikbay SC, Brizendine EJ, Kula KS. Clinical outcomes of 0.018-inch and 0.022-inch bracket slot using the ABO objective grading system. The Angle orthodontist. 2010;80(3):528-32. Epub 2010/01/07.                                                                                           | Included                               |
| 240      | Djeu G, Shelton C, Maganzini A. Outcome assessment of Invisalign and traditional orthodontic treatment compared with the American Board of Orthodontics objective grading system. Am J Orthod Dentofac Orthop 2005;128(3):292-8.                                                                             | Included                               |
| 241      | Farhadian N, Miresmaeili AF, Soltani MK. Comparison of extraction and non extraction orthodontic treatment using the objective grading system. Journal of Dentistry, Tehran University of Medical Sciences, Tehran, Iran (2005; Vol: 2, No.3)                                                                | Included                               |
| 242      | Ferguson DJ, Nazarov AD, Makki L, Wilcko MT, Wilcko WM. Posttreatment and retention outcomes with and without periodontally accelerated osteogenic orthodontics assessed using ABO objective grading system. APOS Trends Orthod 2016;6:194-9.                                                                | Included                               |
| 243      | Hoybjerg AJ, Currier GF, Kadioglu O. Evaluation of 3 retention protocols using the American Board of Orthodontics cast and radiograph evaluation. Am J Orthod Dentofac Orthop 2013;144(1):16-22. Epub 2013/07/03.                                                                                            | Included                               |
| 244      | Hsieh TJ, Pinskaya Y, Roberts WE. Assessment of orthodontic treatment outcomes: early treatment versus late treatment. The Angle orthodontist. 2005;75(2):162-70. Epub 2005/04/14.                                                                                                                           | Included                               |
| 245      | Jain M, Varghese J, Mascarenhas R, Mogra S, Shetty S, Dhakar N. Assessment of clinical outcomes of Roth and MBT bracket prescription using the American Board of Orthodontics Objective Grading System. Contemp Clin Dent. 2013 Jul;4(3):307-12.                                                             | Included                               |
| 246      | Junqueira CHZ. Influência de extrações de pré-molares na estética facial em longo prazo. 2012, Thesis, University of Sao Paulo.                                                                                                                                                                              | Included                               |
| 247      | Knierim K, Roberts WE, Hartsfield J, Jr. Assessing treatment outcomes for a graduate orthodontics program: follow-up study for the classes of 2001-2003. Am J Orthod Dentofac Orthop 2006;130(5):648-55, 55 e1-3. Epub 2006/11/18.                                                                           | Included                               |
| 248      | Kuncio D, Maganzini A, Shelton C, Freeman K. Invisalign and traditional orthodontic treatment postretention outcomes compared using the American Board of Orthodontics objective grading system. The Angle orthodontist. 2007;77(5):864-9.                                                                   | Included                               |
| 249      | Li W, Wang S, Zhang Y. The effectiveness of the invisalign appliance in extraction cases using the the ABO model grading                                                                                                                                                                                     | Included                               |

|     |                                                                                                                                                                                                                                                                                                                              |          |
|-----|------------------------------------------------------------------------------------------------------------------------------------------------------------------------------------------------------------------------------------------------------------------------------------------------------------------------------|----------|
|     | system: A multicenter randomized controlled trial. <i>International J Clinical and Experimental Medicine</i> . 2015;8(5):8276-82.                                                                                                                                                                                            |          |
| 250 | Marques LS, Freitas Junior N, Pereira LJ, Ramos-Jorge ML. Quality of orthodontic treatment performed by orthodontists and general dentists. <i>The Angle orthodontist</i> . 2012;82(1):102-6. Epub 2011/08/03.                                                                                                               | Included |
| 251 | Mendes LM. Influência em longo prazo dos protocolos de tratamento da Classe II na atratividade do perfil. Thesis, 2012, University of Sao Paolo.                                                                                                                                                                             | Included |
| 252 | Mislik B, Konstantonis D, Katsadouris A, Eliades T. University clinic and private practice treatment outcomes in Class I extraction and nonextraction patients: A comparative study with the American Board of Orthodontics Objective Grading System. <i>Am J Orthod Dentofac Orthop</i> 2016;149(2):253-8. Epub 2016/02/02. | Included |
| 253 | Park Y, Hartsfield JK, Katona TR, Eugene Roberts W. Tooth positioner effects on occlusal contacts and treatment outcomes. <i>The Angle orthodontist</i> . 2008;78(6):1050-6. Epub 2008/10/25.                                                                                                                                | Included |
| 254 | Pinskaya YB, Hsieh TJ, Roberts WE, Hartsfield JK. Comprehensive clinical evaluation as an outcome assessment for a graduate orthodontics program. <i>Am J Orthod Dentofac Orthop</i> 2004;126(5):533-43. Epub 2004/11/03.                                                                                                    | Included |
| 255 | Pulfer RM, Drake CT, Maupome G, Eckert GJ, Roberts WE. The association of malocclusion complexity and orthodontic treatment outcomes. <i>The Angle orthodontist</i> . 2009;79(3):468-72. Epub 2009/05/06.                                                                                                                    | Included |
| 256 | Rodríguez JEB, León DMM, Vargas CAH. Evaluación de los tratamientos terminados en un posgrado de ortodoncia según los parámetros ABOs. <i>Revista Latinoamericana de Ortodoncia y Odontopediatría</i> 20xx;1-17                                                                                                              | Included |
| 257 | Santiago JJ, Martinez CJ. Use of the Objective Grading System of the American Board of Orthodontics to evaluate treatment at the Orthodontic Graduate Program Clinic, University of Puerto Rico, 2007-2008. <i>Puerto Rico health sciences journal</i> . 2012;31(1):29-34. Epub 2012/03/22.                                  | Included |
| 258 | Schabel BJ, McNamara JA, Baccetti T, Franchi L, Jamieson SA. The relationship between posttreatment smile esthetics and the ABO Objective Grading System. <i>The Angle orthodontist</i> . 2008;78(4):579-84. Epub 2008/02/28.                                                                                                | Included |
| 259 | Sohrabi K. Does initial malocclusion predict the outcome of orthodontic treatment? Thesis, University of Washington 2016.                                                                                                                                                                                                    | Included |
| 260 | Soltani M, Saedi B, Mohammadi Z. Outcome of MBT and Standard Edgewise Techniques in Treating CI I Malocclusion. <i>AJDR</i> 2012; Vol.4, No.2:61-65.                                                                                                                                                                         | Included |
| 261 | Viwattanatipa N, Buapuean W, Komoltri C. Relationship between Discrepancy Index and the Objective Grading System in Thai board of orthodontics Patients. <i>Orthodontic Waves</i> 2016; 75(3):54-63.                                                                                                                         | Included |
| 262 | Vu CQ, Roberts WE, Hartsfield JK, Jr., Ofner S. Treatment complexity index for assessing the relationship of treatment duration and outcomes in a graduate orthodontics clinic. <i>Am J Orthod Dentofac Orthop</i> 2008;133(1):9 e1-13.                                                                                      | Included |
| 263 | Yang-Powers LC, Sadowsky C, Rosenstein S, BeGole EA. Treatment outcome in a graduate orthodontic clinic using the American Board of Orthodontics grading system. <i>Am J Orthod Dentofac Orthop</i> 2002;122(5):451-5. Epub 2002/11/20.                                                                                      | Included |
