# Supplementary material for: Outcomes of comprehensive fixed appliance orthodontic treatment: A systematic review with meta-analysis and methodological overview
Source: PubMed Central journal article supplement — Korean J Orthod. 2017 Sep 29;47(6):401–13. doi: 10.4041/kjod.2017.47.6.401 (PMC5653689; doi:10.4041/kjod.2017.47.6.401), 2017-09-29
Supplement: kjod-47-401-s004.pdf [file kjod-47-401-s004.pdf]

**Appendix D.** Downs and Black tool used for the risk of bias assessment of included cohort studies with guidance.

| Category                | Item                                                                                                                             | Guidance                                                                                                                                                                                                                |
|-------------------------|----------------------------------------------------------------------------------------------------------------------------------|-------------------------------------------------------------------------------------------------------------------------------------------------------------------------------------------------------------------------|
| Reporting               | Are the characteristics of the study's patients clearly described?                                                               | Are the patients' age, gender, and malocclusion described?                                                                                                                                                              |
|                         | Are the interventions of interest clearly defined?                                                                               | Are the appliances and the treatment approach (ex/non-ex) described to a minimum?                                                                                                                                       |
|                         | Are the distributions of principal confounders in each group clearly described?                                                  | Are confounders (DI, Tx time) described in each group?                                                                                                                                                                  |
|                         | Does the study provide estimates of the random variability in the data for the main outcomes?                                    | Is the variability of the estimate given (SD, SE or 95% CI)?                                                                                                                                                            |
| External validity       | Were the subjects asked to participate in the study representative of the entire population?                                     | Are patients representative of the average orthodontic patient in terms of age (10-20 years) and sex (%male 30%-60%)                                                                                                    |
|                         | Can we be confident that finishing quality not used as a patient selection criterion?                                            | Patients must not be selected according to the treatment results.                                                                                                                                                       |
|                         | Were the staff, places, and facilities where the patients were treated, representative of what the majority of patients receive? | Patients should be treated by a skilled clinician (either orthodontist, last year postgraduate, or experienced clinician)                                                                                               |
|                         | Can we be confident that patients were treated?                                                                                  | In this case, treatment is fairly obvious to ascertain                                                                                                                                                                  |
| Internal validity -bias | Was the study prospectively planned and conducted?                                                                               | Prospective design                                                                                                                                                                                                      |
|                         | Was an attempt made to blind those measuring the main outcome?                                                                   | Was blinding implemented during model scoring with OGS?                                                                                                                                                                 |
|                         | If any of the results of the study were based on "data dredging", was this made clear?                                           | Are there more than 5 subgroups/comparisons?                                                                                                                                                                            |
|                         | Were the main outcome measures used accurate (valid and reliable)?                                                               | For us, it is straightforward, as OGS is very valid.                                                                                                                                                                    |
| Power                   | Did the study have sufficient power to accurately detect an existing effect?                                                     | Sample size for the study (cohort) or for each compared group (comparative cohort studies with at least two groups). Cut-offs used to give 0, 1, 2, 3, 4 or 5 points: 0-20, 20-40, 40-60, 60-80, 80-100, >100 patients. |

DI, discrepancy index; Tx, treatment; SD, standard deviation; SE, standard error; CI, confidence interval; OGS, objective grading system.
