# Supplementary material for: Outcomes of comprehensive fixed appliance orthodontic treatment: A systematic review with meta-analysis and methodological overview
Source: PubMed Central journal article supplement — Korean J Orthod. 2017 Sep 29;47(6):401–13. doi: 10.4041/kjod.2017.47.6.401 (PMC5653689; doi:10.4041/kjod.2017.47.6.401), 2017-09-29
Supplement: kjod-47-401-s006.pdf [file kjod-47-401-s006.pdf]

**Appendix F.** Assessment of study-level explorative factors assessed with random-effects meta-regression for the subgroup of studies that assessed 1-phase fixed appliance treatment,

| Factor                       | ABO OGS score |             |              |              | Tx duration |             |              |       |  |
|------------------------------|---------------|-------------|--------------|--------------|-------------|-------------|--------------|-------|--|
|                              | Studies       | Coefficient | 95% CI       | P            | n           | Coefficient | 95%CI        | P     |  |
| Mean age (yrs)               | 10            | -0.12       | -0.93,0.70   | 0.751        | 8           | 0.59        | -0.33,1.51   | 0.166 |  |
| % male                       | 9             | -7.92       | -46.60,30.75 | 0.643        | 7           | -15.12      | -48.04,17.80 | 0.291 |  |
| % extraction rate* (per 10%) | 12            | -0.65       | -1.42,0.13   | <b>0.093</b> | 8           | -0.01       | -0.12,0.10   | 0.861 |  |
| Mean duration/ABO OGS score  | 8             | 0.13        | -1.26,1.52   | 0.826        | 7           | 0.05        | -0.86,0.96   | 0.885 |  |
| Mean DI                      | 8             | -0.02       | -0.25,0.20   | 0.798        | 4           | 1.22        | -4.45,6.89   | 0.453 |  |

¥Sohradi et al 2016 assessed the ABO OGS scores after 1-/2-phase treatment, but measured treatment duration only for the 1-phase treatment and was excluded from the durations,
