# Supplementary material for: Outcomes of comprehensive fixed appliance orthodontic treatment: A systematic review with meta-analysis and methodological overview
Source: PubMed Central journal article supplement — Korean J Orthod. 2017 Sep 29;47(6):401–13. doi: 10.4041/kjod.2017.47.6.401 (PMC5653689; doi:10.4041/kjod.2017.47.6.401), 2017-09-29
Supplement: kjod-47-401-s007.pdf [file kjod-47-401-s007.pdf]

**Appendix G.** Results of the Egger's test for reporting bias for the primary and secondary outcome.

|                          | ABO OGS score |       |            |       | Tx duration <sup>*</sup> |             |                   |              |  |
|--------------------------|---------------|-------|------------|-------|--------------------------|-------------|-------------------|--------------|--|
|                          | Studies       | Coeff | 95% CI     | P     | n                        | Coeff       | 95%CI             | P            |  |
| Overall                  | 29            | 1.68  | -2.87,6.24 | 0.455 | <b>16</b>                | <b>6.96</b> | <b>0.74,13.19</b> | <b>0.031</b> |  |
| For subgroup:<br>only FA | 15            | 4.17  | -1.15,9.49 | 0.114 | 8                        | 1.70        | -14.86,18.26      | 0.810        |  |

<sup>\*</sup>Sohradi et al 2016 assessed the ABO OGS scores after 1-/2-phase treatment, but measured treatment duration only for the 1-phase treatment and was excluded from the durations,
