# Supplementary figures and images for: Outcomes of comprehensive fixed appliance orthodontic treatment: A systematic review with meta-analysis and methodological overview
Source: PubMed Central journal article supplement — Korean J Orthod. 2017 Sep 29;47(6):401–13. doi: 10.4041/kjod.2017.47.6.401 (PMC5653689; doi:10.4041/kjod.2017.47.6.401), 2017-09-29

## Appendix H. Meta-epidemiological assessment of matching within-studies.

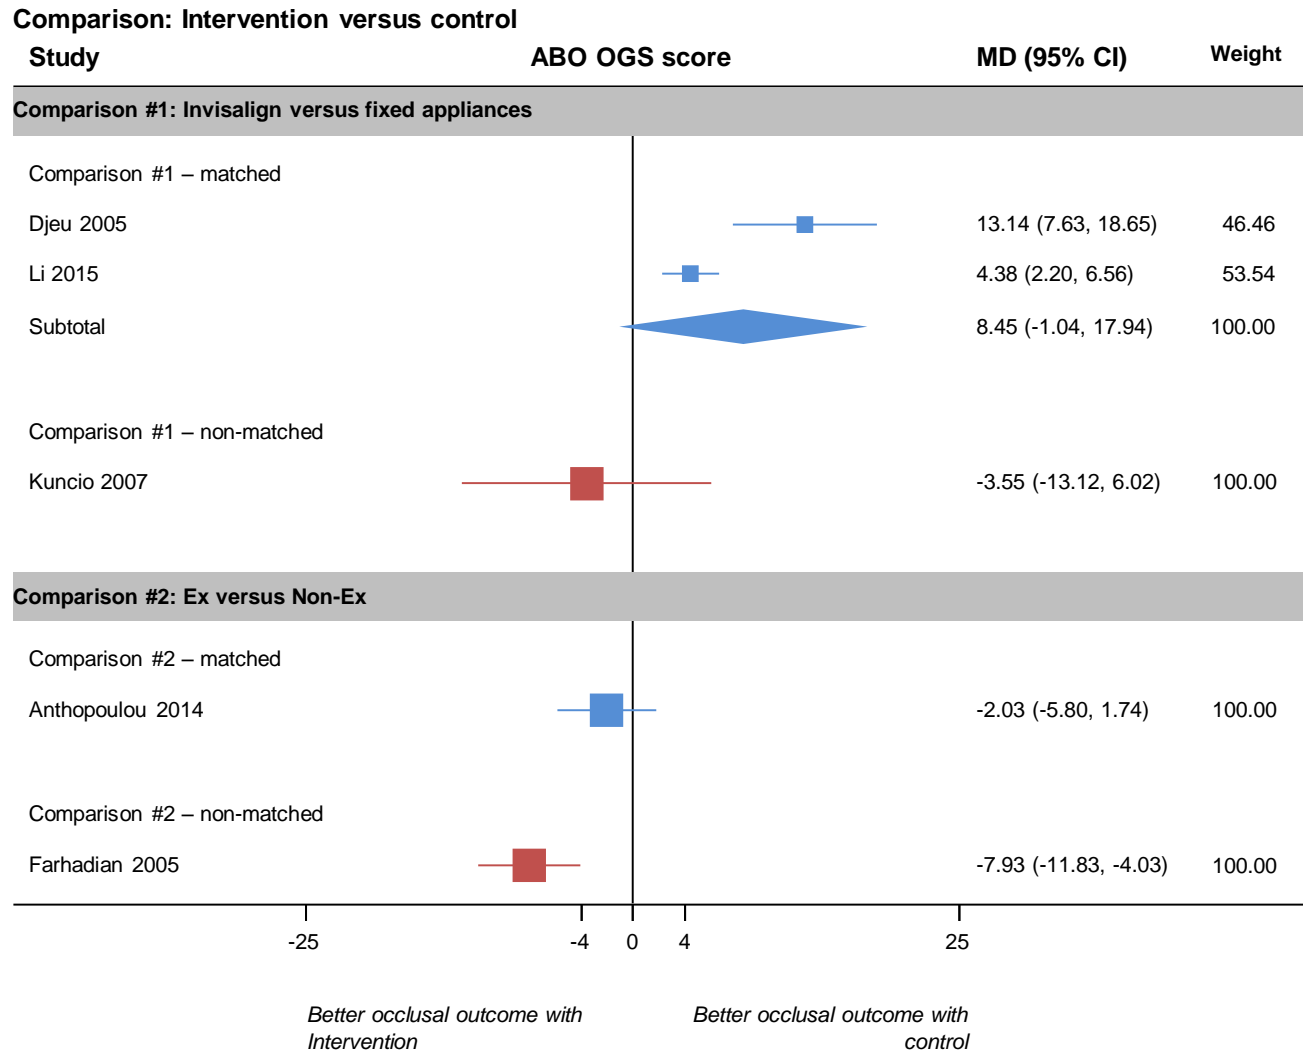

Supplement: kjod-47-401-s008.pdf [file kjod-47-401-s008.pdf]

## Appendix I. Meta-epidemiological assessment of matching across-studies.

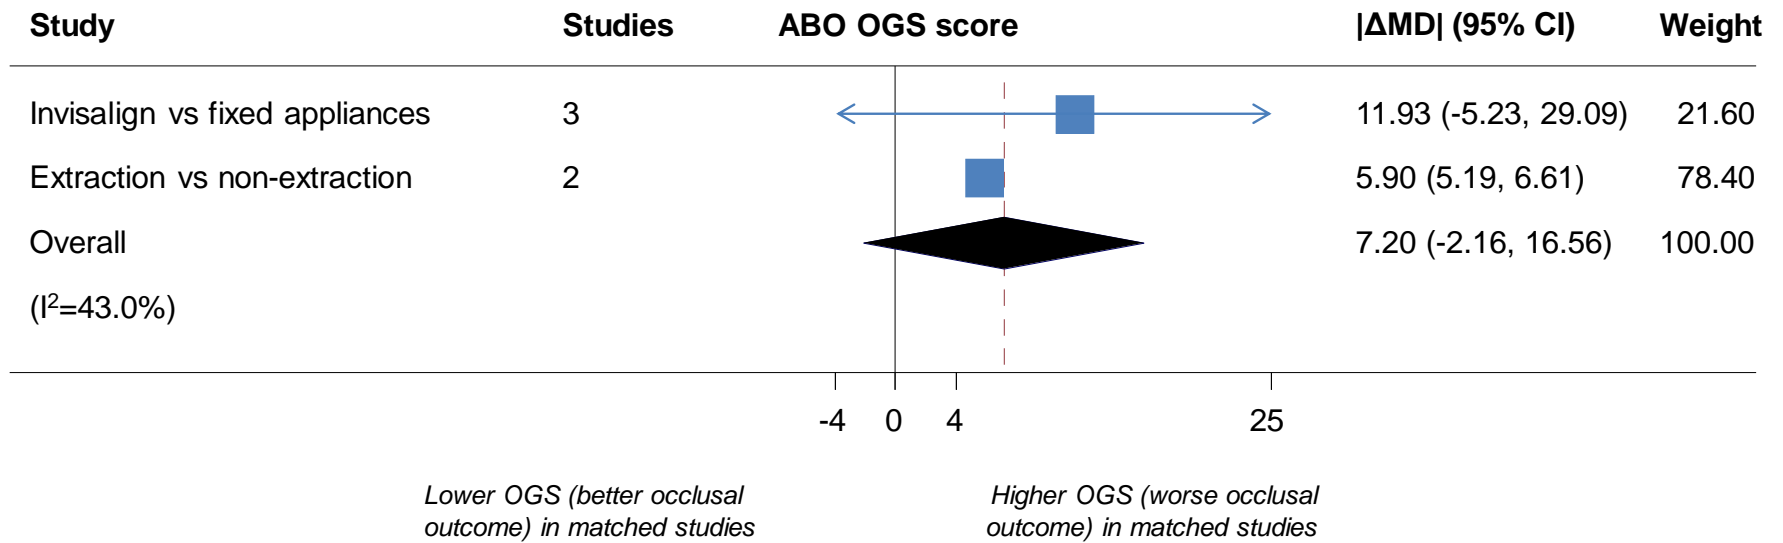

Supplement: kjod-47-401-s009.pdf [file kjod-47-401-s009.pdf]
